# Supplementary material for: Epidemiologic investigation of pathogenic Escherichia coli in domestic dogs in Nanchong area
Source: Research Square preprint supplement (doi:10.21203/rs.3.rs-7708388/v1), 2025-11-10
Supplement: Supplementary file 1 [file 179d14ff95ed5f106363b8d3.xlsx]

## Sheet: Sheet1
1-6 ncRNA	>ctg00029_03968 Location:24086-24449:+@ssrA:transfer-messenger RNA, SsrA GGGGCTGATTCTGGATTCGACGGGATTTGCGAAACCCAAGGTGCATGCCGAGGGGCGGTTGGCCTCGTAAAAAGCCGCAAAAAATAGTCGCAAACGACGAAAACTACGCTTTAGCAGCTTAATAACCTGCTTAGAGCCCTCTCTCCCTAGCCTCCGCTCTTAGGACGGGGATCAAGAGAGGTCAAACCCAAAAGAGATCGCGTGGAAGCCCTGCCTGGGGTTGAAGCGTTAAAACTTAATCAGGCTAGTTTGTTAGTGGCGTGTCCGTCCGCAGCTGGCAAGCGAATGTAAAGACTGACTAAGCATGTAGTACCGAGGATGTAGGA…		1-6 rrna	>ctg00021_03519 5S ribosomal RNA Location:83-194:+@ TGGCGGCCTTAGCGCGGTGGTCCCACCTGACCCCATGCCGAACTCAGAAGTGAAACGCCGTAGCGCCGATGGTAGTGTGGGGTCTCCCCATGCGAGAGTAGGGAACTGCCA >ctg00035_04192 5S ribosomal RNA (partial) Location:31156-31244:-@ CACCTGACCCCATGCCGAACTCAGAAGTGAAACGCCGTAGCGCCGATGGTAGTGTGGGGTCTCCCCATGCGAGAGTAGGGAACTGCCA >ctg00066_04597 23S ribosomal RNA (partial) Location:1-1674:+@ TGCTGGAGGTATCAGA…		1-6 trna	>ctg00001_00057 Location:61383-61460:+@tRNA-Met CGCGGGGTGGAGCAGCCTGGTAGCTCGTCGGGCTCATAACCCGAAGGTCGTCGGTTCAAATCCGGCCCCCGCAACCA >ctg00001_00058 Location:61493-61570:+@tRNA-Met CGCGGGGTGGAGCAGCCTGGTAGCTCGTCGGGCTCATAACCCGAAGGTCGTCGGTTCAAATCCGGCCCCCGCAACCA >ctg00001_00059 Location:61603-61680:+@tRNA-Met CGCGGGGTGGAGCAGCCTGGTAGCTCGTCGGGCTCATAACCCGAAGGTCGTCGGTTCAAATCCGGCCCCCGCAACCA >ctg00001_00128 Locat…
1-9 ncRNA	>ctg00006_01670 Location:24971-25334:+@ssrA:transfer-messenger RNA, SsrA GGGGCTGATTCTGGATTCGACGGGATTTGCGAAACCCAAGGTGCATGCCGAGGGGCGGTTGGCCTCGTAAAAAGCCGCAAAAAATAGTCGCAAACGACGAAAACTACGCTTTAGCAGCTTAATAACCTGCTTAGAGCCCTCTCTCCCTAGCCTCCGCTCTTAGGACGGGGATCAAGAGAGGTCAAACCCAAAAGAGATCGCGTGGAAGCCCTGCCTGGGGTTGAAGCGTTAAAACTTAATCAGGCTAGTTTGTTAGTGGCGTGTCCGTCCGCAGCTGGCAAGCGAATGTAAAGACTGACTAAGCATGTAGTACCGAGGATGTAGGA…		1-9 rrna	>ctg00030_04506 5S ribosomal RNA (partial) Location:2-90:+@ CACCTGACCCCATGCCGAACTCAGAAGTGAAACGCCGTAGCGCCGATGGTAGTGTGGGGTCTCCCCATGCGAGAGTAGGGAACTGCCA >ctg00039_04701 5S ribosomal RNA Location:198-309:+@ TGGCGGCCGTAGCGCGGTGGTCCCACCTGACCCCATGCCGAACTCAGAAGTGAAACGCCGTAGCGCCGATGGTAGTGTGGGGTCTCCCCATGCGAGAGTAGGGAACTGCCA >ctg00047_04728 23S ribosomal RNA (partial) Location:1-1649:+@ TGACTGCGTACCTTTTGTATAA…		1-9 trna	>ctg00001_00240 Location:256681-256768:+@tRNA-Leu GCGAAGGTGGCGGAATTGGTAGACGCGCTAGCTTCAGGTGTTAGTGTCCTTACGGACGTGGGGGTTCAAGTCCCCCCCCTCGCACCA >ctg00001_00241 Location:256796-256883:+@tRNA-Leu GCGAAGGTGGCGGAATTGGTAGACGCGCTAGCTTCAGGTGTTAGTGTTCTTACGGACGTGGGGGTTCAAGTCCCCCCCCTCGCACCA >ctg00001_00242 Location:256917-257004:+@tRNA-Leu GCGAAGGTGGCGGAATTGGTAGACGCGCTAGCTTCAGGTGTTAGTGTCCTTACGGACGTGGGGGTTCAAGTCC…
12-1 ncRNA	>ctg00038_04546 Location:8624-8987:-@ssrA:transfer-messenger RNA, SsrA GGGGCTGATTCTGGATTCGACGGGATTTGCGAAACCCAAGGTGCATGCCGAGGGGCGGTTGGCCTCGTAAAAAGCCGCAAAAAATAGTCGCAAACGACGAAAACTACGCTTTAGCAGCTTAATAACCTGCTTAGAGCCCTCTCTCCCTAGCCTCCGCTCTTAGGACGGGGATCAAGAGAGGTCAAACCCAAAAGAGATCGCGTGGAAGCCCTGCCTGGGGTTGAAGCGTTAAAACTTAATCAGGCTAGTTTGTTAGTGGCGTGTCCGTCCGCAGCTGGCAAGCGAATGTAAAGACTGACTAAGCATGTAGTACCGAGGATGTAGGAAT…		12-1 rrna	>ctg00008_01999 5S ribosomal RNA Location:176-287:+@ TGGCGGCCGTAGCGCGGTGGTCCCACCTGACCCCATGCCGAACTCAGAAGTGAAACGCCGTAGCGCCGATGGTAGTGTGGGGTCTCCCCATGCGAGAGTAGGGAACTGCCA >ctg00015_03123 5S ribosomal RNA (partial) Location:111081-111169:-@ CACCTGACCCCATGCCGAACTCAGAAGTGAAACGCCGTAGCGCCGATGGTAGTGTGGGGTCTCCCCATGCGAGAGTAGGGAACTGCCA >ctg00055_04863 5S ribosomal RNA (partial) Location:1-81:+@ CCCATGCCGAACTCAG…		12-1 trna	>ctg00001_00161 Location:178758-178835:+@tRNA-Pro CGGCACGTAGCGCAGCCTGGTAGCGCACCGTCATGGGGTGTCGGGGGTCGGAGGTTCAAATCCTCTCGTGCCGACCA >ctg00001_00308 Location:341172-341247:+@tRNA-Arg GTCCTCTTAGTTAAATGGATATAACGAGCCCCTCCTAAGGGCTAATTGCAGGTTCGATTCCTGCAGGGGACACCA >ctg00001_00342 Location:384541-384617:-@tRNA-Ala GGGGCTATAGCTCAGCTGGGAGAGCGCTTGCATGGCATGCAAGAGGTCAGCGGTTCGATCCCGCTTAGCTCCACCA >ctg00001_00343 Lo…
12-4 ncRNA	>ctg00056_04449 Location:24199-24562:+@ssrA:transfer-messenger RNA, SsrA GGGGCTGATTCTGGATTCGACGGGATTTGCGAAACCCAAGGTGCATGCCGAGGGGCGGTTGGCCTCGTAAAAAGCCGCAAAAAATAGTCGCAAACGACGAAAACTACGCTTTAGCAGCTTAATAACCTGCTTAGAGCCCTCTCTCCCTAGCCTCCGCTCTTAGGACGGGGATCAAGAGAGGTCAAACCCAAAAGAGATCGCGTGGAAGCCCTGCTTGGGGTTGAAGCGTTAAAACTTAATCAGGCTAGTTTGTTAGTGGCGTGTCCGTCCGCAGCTGGCAAGCGAATGTAAAGACTGACTAAGCATGTAGTACCGAGGATGTAGGA…		12-4 rrna	>ctg00044_04066 5S ribosomal RNA Location:84-195:+@ TGGCGGCCTTAGCGCGGTGGTCCCACCTGACCCCATGCCGAACTCAGAAGTGAAACGCCGTAGCGCCGATGGTAGTGTGGGGTCTCCCCATGCGAGAGTAGGGAACTGCCA >ctg00044_04069 5S ribosomal RNA Location:329-440:+@ TGGCGGCAGTAGCGCGGTGGTCCCACCTGACCCCATGCCGAACTCAGAAGTGAAACGCCGTAGCGCCGATGGTAGTGTGGGGTCTCCCCATGCGAGAGTAGGGAACTGCCA >ctg00124_05152 5S ribosomal RNA (partial) Location:4493-4573:-@ CCCAT…		12-4 trna	>ctg00001_00065 Location:69838-69915:+@tRNA-Met CGCGGGGTGGAGCAGCCTGGTAGCTCGTCGGGCTCATAACCCGAAGGTCGTCGGTTCAAATCCGGCCCCCGCAACCA >ctg00001_00066 Location:69948-70025:+@tRNA-Met CGCGGGGTGGAGCAGCCTGGTAGCTCGTCGGGCTCATAACCCGAAGGTCGTCGGTTCAAATCCGGCCCCCGCAACCA >ctg00001_00128 Location:128271-128345:-@tRNA-Gly GCGGGCGTAGTTCAATGGTAGAACGAGAGCTTCCCAAGCTCTATACGAGGGTTCGATTCCCTTCGCCCGCTCCA >ctg00001_00241 Locati…
12-7 ncRNA	>ctg00006_02658 Location:203448-203811:-@ssrA:transfer-messenger RNA, SsrA GGGGCTGATTCTGGATTCGACGGGATTTGCGAAACCCAAGGTGCATGCCGAGGGGCGGTTGGCCTCGTAAAAAGCCGCAAAAAATAGTCGCAAACGACGAAAACTACGCTTTAGCAGCTTAATAACCTGCTTAGAGCCCTCTCTCCCTAGCCTCCGCTCTTAGGACGGGGATCAAGAGAGGTCAAACCCAAAAGAGATCGCGTGGAAGCCCTGCCTGGGGTTGAAGCGTTAAAACTTAATCAGGCTAGTTTGTTAGTGGCGTGTCCGTCCGCAGCTGGCAAGCGAATGTAAAGACTGACTAAGCATGTAGTACCGAGGATGTAG…		12-7 rrna	>ctg00003_01909 5S ribosomal RNA Location:512278-512389:-@ TGGCGGCAGTAGCGCGGTGGTCCCACCTGACCCCATGCCGAACTCAGAAGTGAAACGCCGTAGCGCCGATGGTAGTGTGGGGTCTCCCCATGCGAGAGTAGGGAACTGCCA >ctg00003_01912 5S ribosomal RNA Location:512523-512634:-@ TGGCGGCCTTAGCGCGGTGGTCCCACCTGACCCCATGCCGAACTCAGAAGTGAAACGCCGTAGCGCCGATGGTAGTGTGGGGTCTCCCCATGCGAGAGTAGGGAACTGCCA >ctg00009_03273 5S ribosomal RNA Location:196621-196716:-…		12-7 trna	>ctg00001_00022 Location:17264-17341:-@tRNA-Pro CGGCACGTAGCGCAGCCTGGTAGCGCACCGTCATGGGGTGTCGGGGGTCGGAGGTTCAAATCCTCTCGTGCCGACCA >ctg00001_00279 Location:286054-286130:-@tRNA-Asn TCCTCTGTAGTTCAGTCGGTAGAACGGCGGACTGTTAATCCGTATGTCACTGGTTCGAGTCCAGTCAGAGGAGCCA >ctg00001_00282 Location:288463-288539:-@tRNA-Asn TCCTCTGTAGTTCAGTCGGTAGAACGGCGGACTGTTAATCCGTATGTCACTGGTTCGAGTCCAGTCAGAGGAGCCA >ctg00001_00284 Loc…
12-9 ncRNA	>ctg00023_04120 Location:41951-42314:-@ssrA:transfer-messenger RNA, SsrA GGGGCTGATTCTGGATTCGACGGGATTTGCGAAACCCAAGGTGCATGCCGAGGGGCGGTTGGCCTCGTAAAAAGCCGCAAAAAATAGTCGCAAACGACGAAAACTACGCTTTAGCAGCTTAATAACCTGCTTAGAGCCCTCTCTCCCTAGCCTCAGCTCTTAGGACGGGGATCAAGAGAGGTCAAACCCAAAAGAGATCGCGTGGAAGCCCTGCCTGGGGTTGAAGCGTTAAAACTTAATCAGGCTAGTTTGTTAGTGGCGTGTCCGTCCGCAGCTGGCAAGCGAATGTAAAGACTGACTAAGCATGTAGTACCGAGGATGTAGGA…		12-9 rrna	>ctg00003_01016 5S ribosomal RNA Location:49-160:+@ TGGCGGCCTTAGCGCGGTGGTCCCACCTGACCCCATGCCGAATTCAGAAGTGAAACGCCGTAGCGCCGATGGTAGTGTGGGGTCTCCCCATGCGAGAGTAGGGAACTGCCA >ctg00003_01019 5S ribosomal RNA Location:294-405:+@ TGGCGGCAGTAGCGCGGTGGTCCCACCTGACCCCATGCCGAACTCAGAAGTGAAACGCCGTAGCGCCGATGGTAGTGTGGGGTCTCCCCATGCGAGAGTAGGGAACTGCCA >ctg00010_02662 5S ribosomal RNA Location:297-408:+@ TGGCGGCCTTAGCGCGG…		12-9 trna	>ctg00001_00069 Location:70928-71009:+@tRNA-Ser CCGCCATTAGCTCATCAGGAAGAGCAGACGACAACCAGGATTGTTGTATGGTACGGGGTTCGAGGCCTCGATGGCGGTCCA >ctg00001_00284 Location:287765-287842:+@tRNA-Arg GCGCCCTTAGCTCAGTTGGATAGAGCAACGACCTTCTAAGTCGTGGGCCGCAGGTTCGAATCCTGCAGGGCGCGCCA >ctg00001_00386 Location:395813-395888:-@tRNA-Gln TGGGGTATCGCCAAGCGGTAAGGCACCGGATTCTGATTCCGGCATTCCGAGGTTCGAATCCTCGTACCCCAGCCA >ctg00001_00387…
