# Supplementary material for: Epidemiologic investigation of pathogenic Escherichia coli in domestic dogs in Nanchong area
Source: Research Square preprint supplement (doi:10.21203/rs.3.rs-7708388/v1), 2025-11-10
Supplement: Supplementary file 2 [file 206c7254fc1e65e7d392ba4c.xlsx]

## Sheet: Sheet1
1-6 Genome	>ctg00001 [topology=linear] [organism=Escherichia_coli] ACGACTTCAAGGCGCTTTTCAAAAGGGTATTTTGGCTTTGACATATTAGGGGCTATTCCA TTTCATCGTCCAACAAAATGGGTGCAGTACAGGTTGATAGAAAAATCGCCTGGGGCTTTT GTCCATCTGGAACCTCGCGAATGCTTAACGCCAGACAGCCTCAAGCACCCGACGCCATTC TATACCTGATAATTCTTCCCGCGGCGTTCACGTTTAAAATCAGGAATGCTGCTCGCAAAA TAAAAACGCCCCCATCATTTCTGACAGAGGCGTTTAATTTGTCCGGCAATATTTACCCTT CGTGTAACCCACATTCCCTTTTTAAGCCAAAGAAACGC…
1-9 Genome	>ctg00001 [topology=linear] [organism=Escherichia_coli] TTAAAGAGCAGTTGCGACGCGGCTTTCAGCTCACTGTCGCGAGGTGGCGTATATTACGCT TTCCTCTTTCAGAGTCAACCCTGAATTTCAGAATTTTTCTCTTCAACCGAACCCGCTGTT TGTGTGAAGTGATTCACATCCGCCGTGTCGATGGAGGCGCATTATAGGGAGTCGGCTCAG GAAGACAAGCGGAAAAATGCATTTTTATTTCAACCGCTCATCTTTTAATCATTGCGCCGG TTTTTGCTGCTTTTTTATCGCTTGCGGCAGGTCTGCCAGGCTATTTAACACCCAATCTGC CGCGTTTTCTGCTTCAGGCGTAATAGGTTTACCCGTAC…
12-1 Genome	>ctg00001 [topology=linear] [organism=Escherichia_coli] ATCAGTTGTGATGATTTTTCCTTTAATATCCAGCATGTTAAGAAGTTCTGGGATAGCTGT AATCTCATTAGATTTCTCATCCGTCTTGATCCGTCCGATGACCAGACTGTGCATTGTTGA GAACGCACTTATGACATGAATCGCTCCCTTGCGGCGACTCTTGCCATAAGAATGCCGGAG AGTTGTTCCATCAATAGCGATGTCGTCTTTACCATCTGAAGAAAAGCAGTCACGCATTAT CCAGTGAATAAAGCACTCGTGAAATTTTGCAGGACTAATACAGGATACAACTCTGGCAAT GGTATCGTGAACAGGAATACCATTTGCAAAAACACAAA…
12-4 Genome	>ctg00001 [topology=linear] [organism=Escherichia_coli] CACTTCCTGGAAGAATAGAACGTCGCTGCCGTGACGTTATGCGGATAATGCTACCGTTGG TGAAGGAGCTGGCGAAGGCGTCTTGATGGGTTTGAAAATGGGAGCTGGGAGTTCTACCGC AGGGGCGGGGAATTCTAAGTGATATCCATCATCGCATCCAGTGCGCCCGGTTTATCCCCG CTGGCGCGGGGAACACTCACGCGCTGTTACCCAGTCCCTTTTTTTCAGCGGTTTATCCCC GCTGGCGCGGGGAACACCGCCGCGGACTCACGAGCAGACCATCACAGACCGGTTTATCCC CGCTGGCGCGGGGAACACGCAGACTATAACGAGGGTCG…
12-7 Genome	>ctg00001 [topology=linear] [organism=Escherichia_coli] CCCTTTAGTGGTGTTAGCGAATTTTTTGGTGCGATGACGACCATCAGGACGCAACACATC GACATCCAGTTTCTCTTTAGCGGTGTCGATACCGATATAATGAAGTTCATGTTCCATAGT GAAACCAACCTTGCAAATACGGATTACCGGGAAAACCGGTCCATGATACTGTCCGGTTTA TCACTTTGGGAGAAAGGCAGTCCGCTGCATAAATCTACGCAACAGGTTAGAACCCAAGGC CCGATACGGCATGCGGACTGCAGGCAGAGAAAACTGGCCGATTTTCTCTGCACTGGAGGG ATAATACAAGGCCTGATAAGACGCGTCAGCGTCGCATC…
12-9 Genome	>ctg00001 [topology=linear] [organism=Escherichia_coli] AGGCCAAAGCATTCATGGCCGGGGGCTATGGCGCACTGTCCCTGCGCGACGCTGAGGATG TGGGCTCTGCACTGAATGCACTGAAAAATCTGAACTTCTAATCAGGAGAAATACGATGGC GGTTGATATTAAAGATGTCGAACAGGTCGCGCAGGAGCTGCAGCAGAAGTTTGACGACTT CAAAGCAAAGAACGACAAGCGCGTGGATGCGATTGAGCAGGAAAAAGGCAAACTTGCCGG GCAGGTGGAAACCCTGAACGGGAAACTCAGCGAGCTGGAAAATCTCAAAAGCGACCTTGA AAAAGAGCTGCTTGAGCTGAAACGTCCGGCAGGTGGTG…
