# Supplementary material for: Epidemiologic investigation of pathogenic Escherichia coli in domestic dogs in Nanchong area
Source: Research Square preprint supplement (doi:10.21203/rs.3.rs-7708388/v1), 2025-11-10
Supplement: Supplementary file 4 [file 99e8440d1809e5a7261caec9.docx]

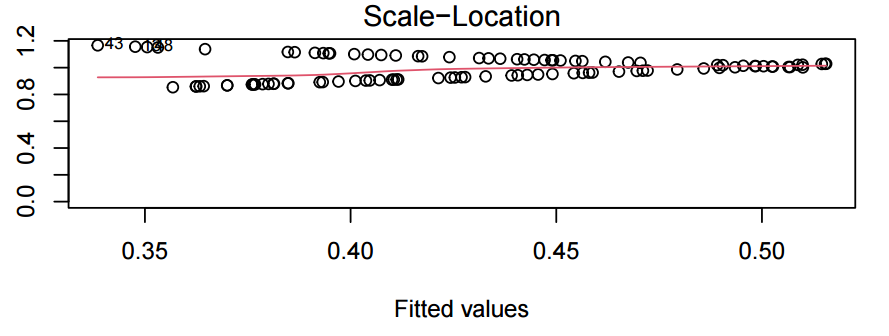


**Figure 1 Standardized residual plot of pathogenic E. coli influencing factors in the Nanchong area**


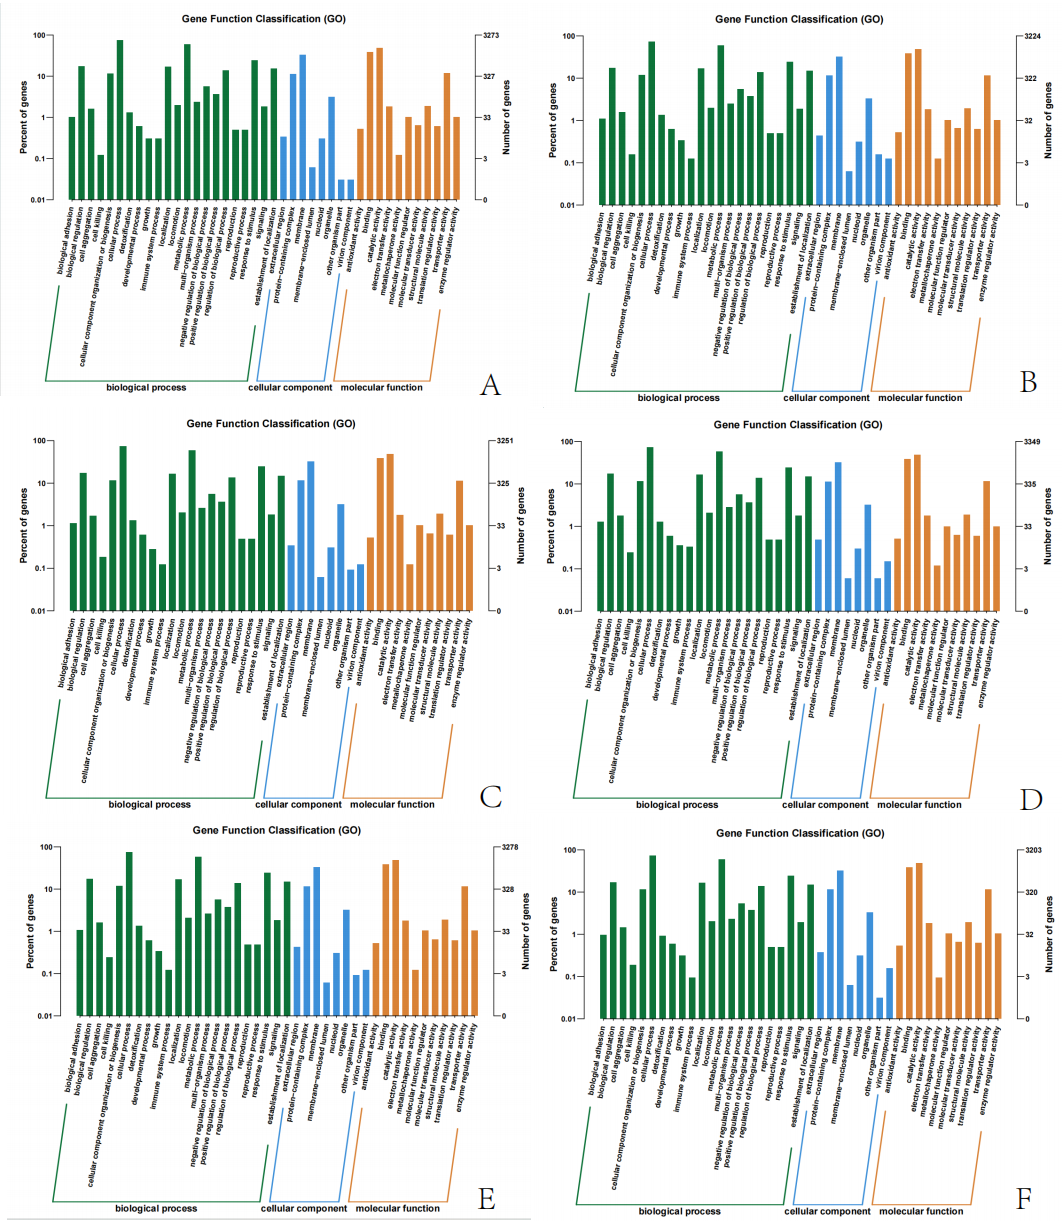


**Figure 2 E. coli GO Functional Classification Annotation Database Comparison**

Note: Horizontal coordinates GO each classification, vertical coordinates are the percentage of the number of genes on the left, the number of genes on the right


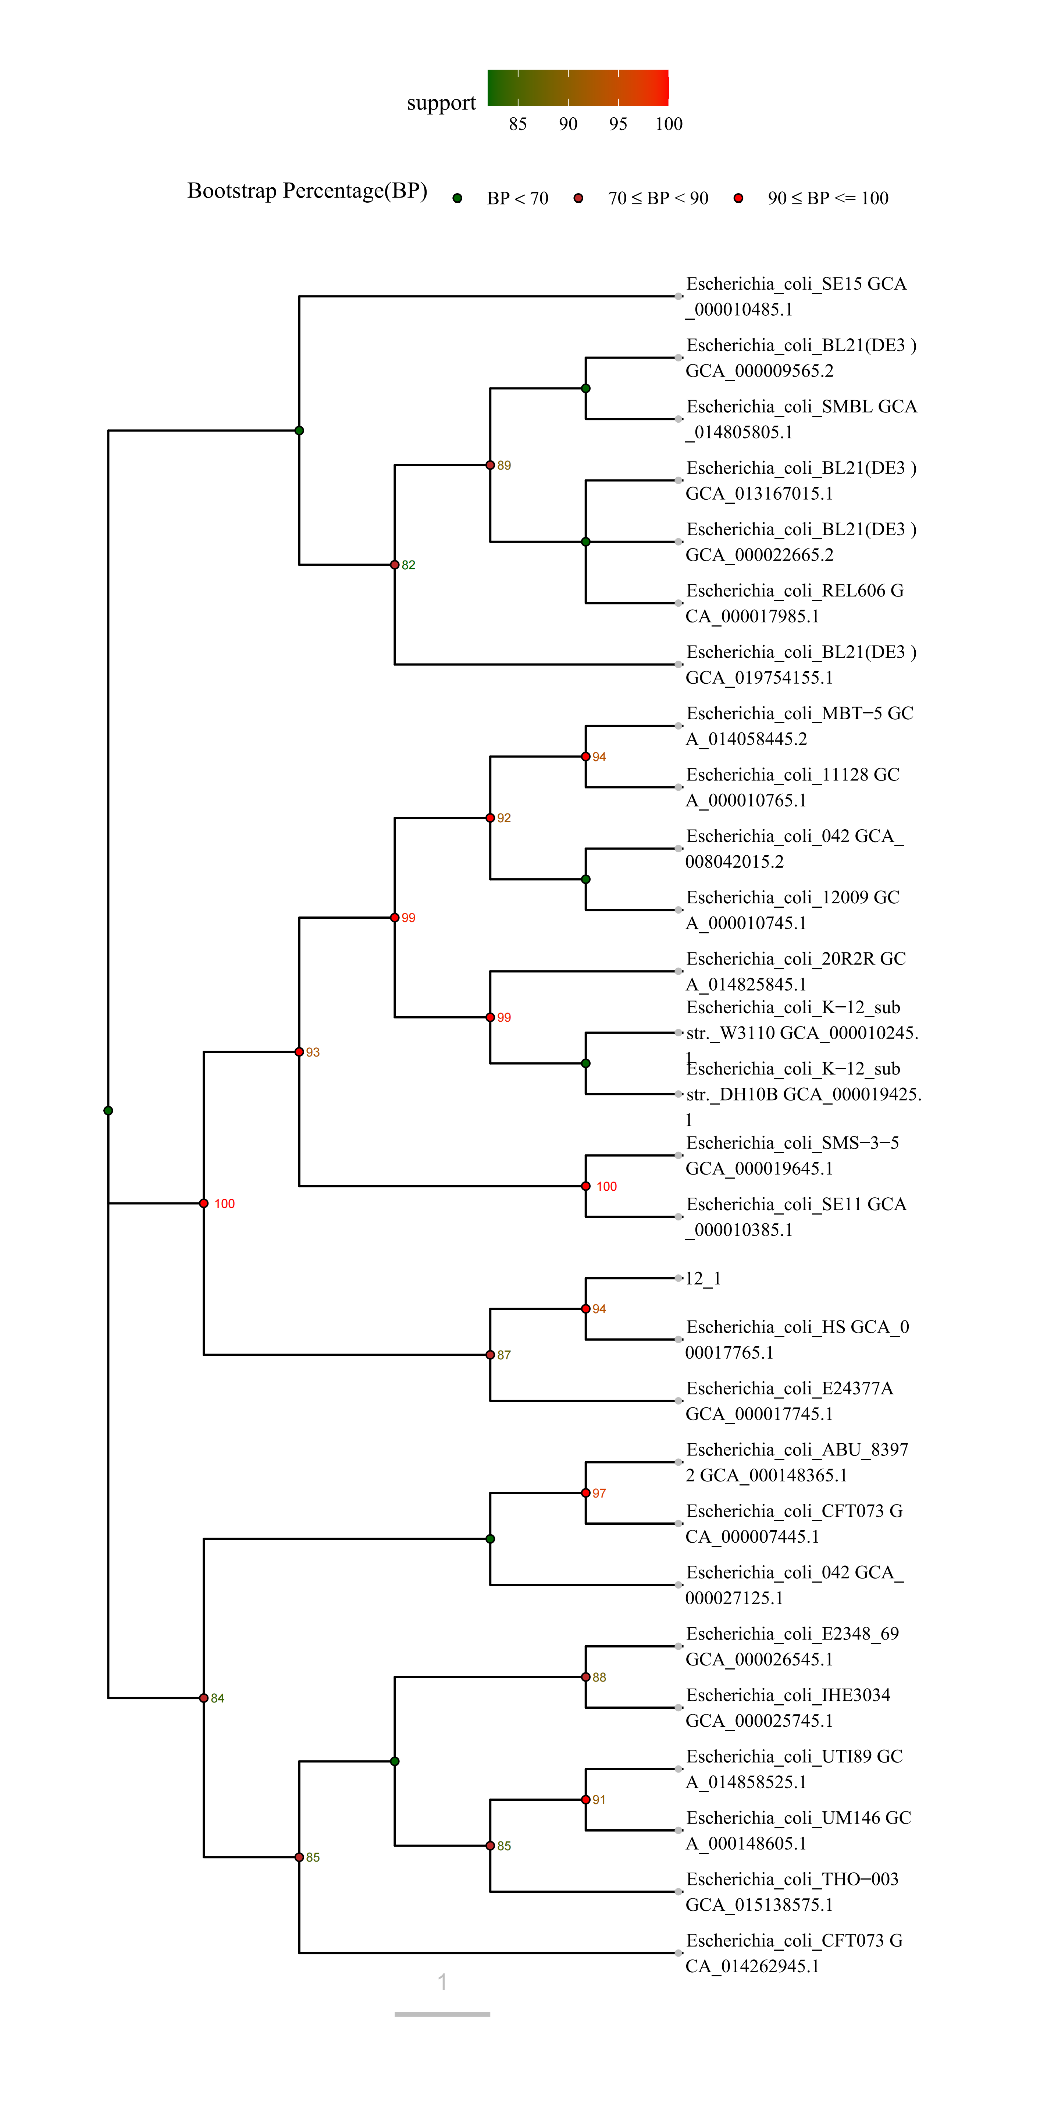


**Figure 3 Circular evolutionary tree based on 16S rRNA**


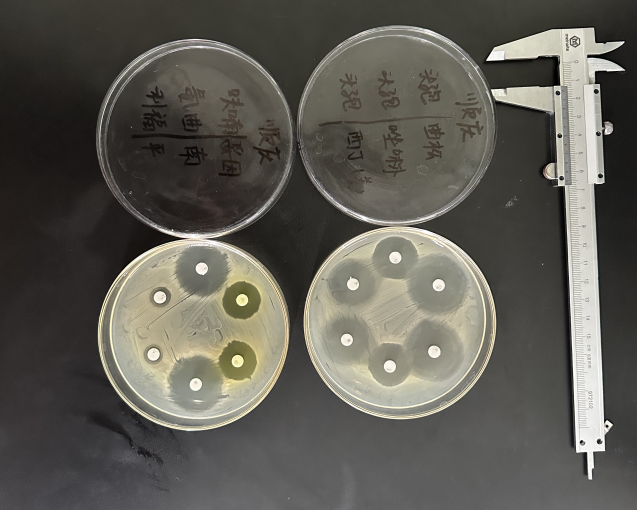

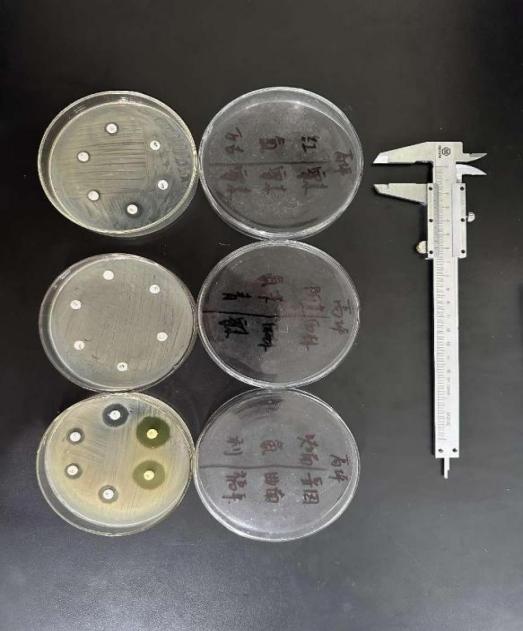


**Figure 3 Reaction of pathogenic Escherichia coli to drug-sensitive tablets**
