# Supplementary material for: Epidemiologic investigation of pathogenic Escherichia coli in domestic dogs in Nanchong area
Source: Research Square preprint supplement (doi:10.21203/rs.3.rs-7708388/v1), 2025-11-10
Supplement: Supplementary file 5 [file b0489933415e111a6c09dda3.xlsx]

## Sheet: Sheet1
1-6 cds	>ctg00001_00002 Location:292-1027:-@cysH:Phosphoadenosine phosphosulfate reductase ATGTCCAAACTCGATCTAAACGCCCTGAACGAACTGCCGAAGGTAGATCGCATTCTGGCGCTGGCGGAAACTAACGCCCAACTGGAAAAACTGGACGCTGAAGGCCGCGTAGCCTGGGCGCTGGATAATCTGCCCGGTGAATATGTGCTTTCTTCCAGCTTCGGCATTCAGGCGGCGGTGAGCCTGCATCTGGTGAATCAGATTCGCCCGGATATTCCAGTGATCCTCACCGATACCGGTTACTTGTTCCCGGAAACCTACCGCTTTATTGACGAGTTAACGGACAAACTCAAGCTCAACCTGAAAGTGTACCGCG…
1-6 pep	>ctg00001_00002 Location:292-1027:-@cysH:Phosphoadenosine phosphosulfate reductase MSKLDLNALNELPKVDRILALAETNAQLEKLDAEGRVAWALDNLPGEYVLSSSFGIQAAVSLHLVNQIRPDIPVILTDTGYLFPETYRFIDELTDKLKLNLKVYRATESAAWQEARYGKLWEQGVEGIEKYNDINKVEPMNRALKELNAQTWFAGLRREQSGSRANLPVLAIQRGVFKVLPIIDWDNRTIYQYLQKHGLKYHPLWDEGYLSVGDTHTTRKWEPGMAEEETRFFGLKRECGLHEG >ctg00001_00003 Location:1100-2813:-@cysI:Sulfite reductase [NADPH] hem…
1-9 cds	>ctg00001_00001 Location:228-804:-@gmhB:D-glycero-beta-D-manno-heptose-1,7-bisphosphate 7-phosphatase GTGGCGAAGAGCGTACCCGCAATTTTTCTTGACCGTGATGGCACCATTAATGTCGATCACGGCTATGTCCATGAGATCGACAACTTTGAATTTATCGACGGTGTTATTGACGCCATGCGCGAGCTAAAAAAAATGGGCTTTGCGCTGGTGGTAGTAACCAACCAGTCTGGCATTGCTCGCGGTAAATTTACTGAAGCACAGTTTGAAACGCTGACCGAGTGGATGGACTGGTCGCTGGCGGACCGCGATGTCGATCTGGATGGTATCTATTATTGCCCGCATCATCCGCAGGGTAGT…
1-9 pep	>ctg00001_00001 Location:228-804:-@gmhB:D-glycero-beta-D-manno-heptose-1,7-bisphosphate 7-phosphatase MAKSVPAIFLDRDGTINVDHGYVHEIDNFEFIDGVIDAMRELKKMGFALVVVTNQSGIARGKFTEAQFETLTEWMDWSLADRDVDLDGIYYCPHHPQGSVEEFRQVCDCRKPHPGMLLSARDYLHIDMAASYMVGDKLEDMQAAAAANVGTKVLVRTGKPITPEAENAADWVLNSLADLPQAIKKQQKPAQ >ctg00001_00002 Location:991-2023:+@metN:Methionine import ATP-binding protein MetN MIKLSNITKVFHQGTRTIQAL…
12-1 cds	>ctg00001_00001 Location:723-1971:-@rfbX:Putative O-antigen transporter ATGGAAATGATTAAATCTACATTAATGAGGAATATATTATTTTTAGGACTAATACAAGGTAGTTCTTTCCTGTTACCTCTTATATTGTTGCCATTTCTAATTAAAACACTAGGTACTGAAACATATGGAAAAATGATATTGTATCAAGTCTTTTTTTTATACTTAAGCACAATTATTGATTTTGGATATAATTTTTCCGCGACACAAAATATTGCAAGAAATCAAAATGATTCTTATCATATAAAGAAAGTCTTTAGCTGTACAATTTGGTGTAAAATATTTATTTTTATAATTGTTTTTATATTTTTATTAGGATGTGGATTGTGG…
12-1 pep	>ctg00001_00001 Location:723-1971:-@rfbX:Putative O-antigen transporter MEMIKSTLMRNILFLGLIQGSSFLLPLILLPFLIKTLGTETYGKMILYQVFFLYLSTIIDFGYNFSATQNIARNQNDSYHIKKVFSCTIWCKIFIFIIVFIFLLGCGLWTKKNYDILLVICFIPQLIGYVLTPQWLFQGIEKTNILAICTITARLFTTLIILITVHKSTDIYLAAFLQSVTFLLTAILSLYYIYSTKIASFSYVCMKDIKDSLIESFPFFISIFSVNLYTTLPALVIGVVLGNVNLAYYNIALTIRNALLGLFNPISQSLFPRVNNLYSIDQNRAYKLIKQSLIVVAVIFIFLAITTNIMSDFIVNKILGHSEFIVV…
12-4 cds	>ctg00001_00001 Location:902-1196:-@ygbF_1:CRISPR-associated endoribonuclease Cas2 ATGAGCATGGTCGTGGTTGTTACAGAAAATGTCCCGCCGCGCTTACGTGGACGGCTCGCAATCTGGCTACTGGAAGTGCGTGCCGGTGTGTATGTTGGTGATACATCAAAACGTATTCGGGAGATGATCTGGCAGCAAATTACCCAACTGGCAGGTTGTGGAAATGTGGTCATGGCCTGGGCGACAAATACTGAGTCTGGTTTTGAGTTTCAGACCTGGGGCAAAAACAGACGTATTCCGGTGGATTTGGATGGGTTACGTTTGGTTTCTTTTCTTCCTGTTGATAATCAATAA >ctg00001_00002 Locat…
12-4 pep	>ctg00001_00001 Location:902-1196:-@ygbF_1:CRISPR-associated endoribonuclease Cas2 MSMVVVVTENVPPRLRGRLAIWLLEVRAGVYVGDTSKRIREMIWQQITQLAGCGNVVMAWATNTESGFEFQTWGKNRRIPVDLDGLRLVSFLPVDNQ >ctg00001_00002 Location:1195-2116:-@ygbT_1:CRISPR-associated endonuclease Cas1 MTFVPLSPIPLKDRTSMIFLQYGQIDVLDGAFVLINKTGIRTHIPVGSVACIMLEPGTRVSHAAVHLAATVGTLLVWVGEAGVRVYSSGQPGGARADKLLYQAKLALTEDLRLKVVRKMYELRFREPPPARRSVEQLR…
12-7 cds	>ctg00001_00003 Location:532-1021:-@eco:Ecotin ATGAAGACCATTCTACCTGCAGTATTGTTTGCCGCTTTCGCTACCACTTCCGCCTGGGCGGCAGAAAGCGTCCAGCCACTGGAAAAAATCGCGCCTTATCCACAAGCTGAAAAAGGGATGAAGCGTCAGGTGATTCAGTTAACCCCGCAAGAAGATGAATCTACCCTGAAAGTAGAACTGTTAATCGGTCAGACGCTGGAAGTCGATTGCAATTTGCATCGTCTCGGCGGGAAGCTGGAAAGCAAAACGCTGGAAGGCTGGGGCTATGATTATTATGTCTTTGATAAAGTTAGCTCGCCGGTTTCCACGATGATGGCCTGTCCGGATGGCAAGAAAGAGAAGAAATTTGTCA…
12-7 pep	>ctg00001_00003 Location:532-1021:-@eco:Ecotin MKTILPAVLFAAFATTSAWAAESVQPLEKIAPYPQAEKGMKRQVIQLTPQEDESTLKVELLIGQTLEVDCNLHRLGGKLESKTLEGWGYDYYVFDKVSSPVSTMMACPDGKKEKKFVTAYLGDAGMLRYNSKLPIVVYTPDNVDVKYRVWKAEEKIDNAVVR >ctg00001_00004 Location:1155-1320:-@hypothetical protein MHTPIGVKPVAGSKEWREAWQKRAFAHISNGYKYIYIAINSPEIFLLVCSLIRI >ctg00001_00005 Location:1428-1923:+@napF:Ferredoxin-type protein NapF MKIDA…
12-9 cds	>ctg00001_00001 Location:115-1321:+@hypothetical protein ATGGCGGTTGATATTAAAGATGTCGAACAGGTCGCGCAGGAGCTGCAGCAGAAGTTTGACGACTTCAAAGCAAAGAACGACAAGCGCGTGGATGCGATTGAGCAGGAAAAAGGCAAACTTGCCGGGCAGGTGGAAACCCTGAACGGGAAACTCAGCGAGCTGGAAAATCTCAAAAGCGACCTTGAAAAAGAGCTGCTTGAGCTGAAACGTCCGGCAGGTGGTGCGCAAAATAAACTGGCCACCGAGCATAAAGAGGCGTTTGTGGGCTTCCTGCGTAAAGGCCGTGAAGACGGTCTGCGCGATCTGGAGCGCAAGGCATTGCAGGTGGGCACCGATGAAGAC…
12-9 pep	>ctg00001_00001 Location:115-1321:+@hypothetical protein MAVDIKDVEQVAQELQQKFDDFKAKNDKRVDAIEQEKGKLAGQVETLNGKLSELENLKSDLEKELLELKRPAGGAQNKLATEHKEAFVGFLRKGREDGLRDLERKALQVGTDEDGGYAVPEALDRNILTLLKDEVVMRQEATVITVGGSDYKKLVNLGGTASGWVGETDARSQTATSKLGLIEPFMGEIYGNPQATQKMLDDAFFNVEAWINSELATEFAEQEEIAFTSGDGTKKPKGFLAYESTDETDKVRAFGKLQHIVSGEATTVTADAIIKLIYTLRKAHRTGAKFMMNNNSLFAIRLLKDSEGNYLWRPGLELGQPSSLAGYGIAENEQMPDISADA…
